# Supplementary material
Source: PubMed Central journal article supplement (PMC4489710)
Supplement: NIHMS701677-supplement-supmat.pdf [file NIHMS701677-supplement-supmat.pdf]

# Spectroscopy of Non-Heme Iron Thiolate Complexes: insight into the electronic structure of the low spin active site of Nitrile Hydratase

*Pierre Kennepohl<sup>†,1</sup>, Frank Neese<sup>†,2</sup>, Dirk Schweitzer<sup>‡</sup>, Henry L. Jackson<sup>‡</sup>,  
Julie A. Kovacs<sup>‡,\*</sup>, and Edward I. Solomon<sup>†,\*</sup>*

Contribution from the Department of Chemistry, Stanford University, Stanford, CA 94305  
and the Department of Chemistry, University of Washington, Seattle, Washington 98195.

[kovacs@chem.washington.edu](mailto:kovacs@chem.washington.edu), [Edward.Solomon@Stanford.EDU](mailto:Edward.Solomon@Stanford.EDU)

## RECEIVED DATE

Spectroscopy of Low-Spin Iron Thiolate Complexes

\* corresponding authors; <sup>†</sup> Stanford University; <sup>‡</sup> University of Washington; <sup>1</sup> Current address:  
Department of Chemistry, University of British Columbia, Vancouver, BC V6T 1Z1, Canada; <sup>2</sup> Current  
address: Max-Planck-Institut für Bioanorganische Chemie, D-45470 Mülheim an der Ruhr, Germany

## Supporting Information

---

The following information is available as supporting information to this manuscript: (S1) the saturation magnetization behavior for complex **1**; (S2) the computational details for DFT and ROHF-CISD calculations for complex **1**; (S3) the computational details for DFT and ROHF-CISD calculations

for complex **2**; (S4) LT-Abs mull spectra of **2**; and (S5) the computational details for DFT calculations on a truncated version of **1**.

**(S1)** Saturation Magnetization Behaviour of (**1**) at different temperatures at 450nm (top) and at different wavelengths (bottom).

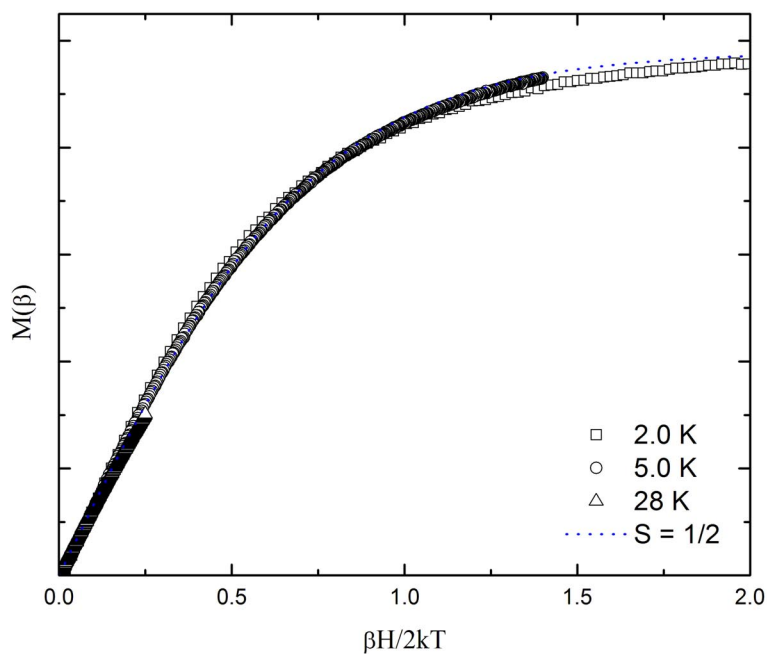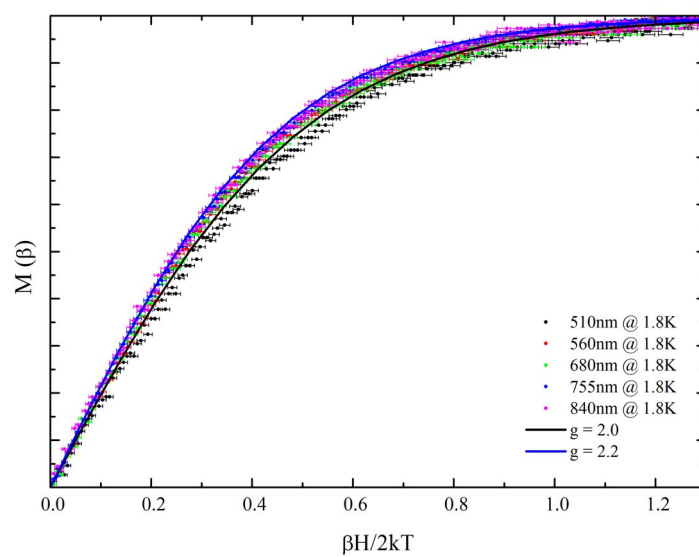

## (S2) Computational details for DFT and ROHF-CISD calculations for (1).

### ADF Input File (crystallographic coordinates)

#### ROHF-CISD Input File for ORCA

```
# *** Model complexes for nitrile hydratase - 5C species + N3
# *** ROHF + CI singles/doubles
# ***
[Method]
  Method = INDO;
  Version = ZINDO_S;
  RunTyp = Energy;
[End]
[BASIS]
  Meta13d = Gouterman;
  Meta14sp = Gouterman;
[End]
[PARAS]
  SOCPars = Standard;
  ZDOIPPar = IP_Cache;
[End]
[REDEF]
  SOCFE3d= 430;
[End]
[SCF]
  MaxIter = 1000;
  HFtyp = ROHF;
  SCFTolE = 5e-9;
  CNVRico = yes;
  SCFTolErr = 5e-8;
  UHFNatOrb = yes;
  Guess = MORead;
  MOInp = "FES2N3+N3-ROHF.OUT";
[End]
[COORDS]
  ctyp = Cartesian;
  charge = 0;
  mult = 2;
  coords
  #
  # Molecular Fragments:
  # (1) Fe(III) ion
  # (2) S*CH2- group
  # (3) S*CH2- group
  # (4) -CH2N*=CH- group
  # (5) -CH2CH2N*HCH2CH2- group
  # (6) -CH2N*=CH- group
  # (7) N3
  #
  # Ligand structure is broken down as follows:
  # *SCH2-CH=N*CH2-CH2CH2N*HCH2CH2-CH2N*H=CH-CH2S*
  # | 2 | 4 | | 5 | | 6 | 3 |
  #
  # Fragment-Fragment interactions of interest:
  # 1-2 & 1-3 = Fe-thiolate bonds
  # 1-4 & 1-6 = Fe-imine bonds
  # 1-5 = Fe-amine bond
  # 1-7 = Fe-azide bond
  # 2-4 = C-C bond
  # 4-5 = C-C bond
  # 5-6 = C-C bond
  # 6-3 = C-C bond
  #
  #01# Fe(1) +3.00 .1475 -.0608 -.1031
  #02# S(2) -1.00 2.3433 -.0608 -.1031
  #03# C(2) 0.00 2.6865 1.7466 -.1031
  #04# C(4) 0.00 1.4518 2.4752 .3701
  #05# N(4) 0.00 .3260 1.8498 .3758
  #06# C(4) 0.00 -.8583 2.5741 .8666
  #07# C(5) 0.00 -2.1409 2.2032 .1184
  #08# C(5) 0.00 -2.7373 .8911 .5577
  #09# N(5) 0.00 -1.9915 -.2820 .0699
  #10# C(5) 0.00 -2.4855 -1.4945 .7693
  #11# C(5) 0.00 -2.0008 -2.8242 .2344
  #12# C(6) 0.00 -.4692 -2.9287 .2140
  #13# N(6) 0.00 .0191 -1.9192 -.7426
  #14# C(6) 0.00 .1627 -2.2527 -1.9806
  #15# C(3) 0.00 .3808 -1.1572 -3.0091
  #16# S(3) -1.00 -.0565 .4600 -2.2398
  #17# H(3) 0.00 1.4304 -1.1424 -3.3384
  #18# H(3) 0.00 -.2867 -1.3040 -3.8711
  #19# H(6) 0.00 .1106 -3.2371 -2.3419
  #20# H(6) 0.00 -.1880 -3.8095 -.0445
```

```

#21# H(6) 0.00 -.1317 -2.7434 1.0934
#22# H(5) 0.00 -2.3739 -3.5451 .7469
#23# H(5) 0.00 -2.3083 -2.9164 -.6702
#24# H(5) 0.00 -2.2196 -1.4343 1.6897
#25# H(5) 0.00 -3.4452 -1.4944 .7444
#26# H(5) 0.00 -2.2779 -.3859 -.7771
#27# H(5) 0.00 -3.6331 .8407 .2164
#28# H(5) 0.00 -2.7836 .8541 1.5160
#29# H(5) 0.00 -1.9372 2.1612 -.8188
#30# H(5) 0.00 -2.7869 2.9020 .2439
#31# H(4) 0.00 -.9790 2.3781 1.7986
#32# H(4) 0.00 -.7014 3.5172 .7811
#33# H(4) 0.00 1.5743 3.4754 .6653
#34# H(2) 0.00 3.5404 1.9198 .5684
#35# H(2) 0.00 2.9425 2.0965 -1.1140
#36# N(7) -1.00 .1060 -.5095 1.9121
#37# N(7) 0.00 .7189 .1532 2.6442
#38# N(7) 0.00 1.3457 .8309 3.3930
end;
[End]
[CI]
CITyp = Rumer;
UseSym = no;
NVecs = 35;
Reduce = yes;
MaxE = 75000;
MaxT = 1000;
NSelect = -1;
CIDiag = Givens;
RootE = 75000;
Flags = 1,1,0,0,0,1;
NewRef=( o(46)2222222100, 0.5 );
NewRef=( o(46)2222221200, 0.5 );
NewRef=( o(46)2222212200, 0.5 );
NewRef=( o(46)2221222200, 0.5 );
NewRef=( o(46)2221222200, 0.5 );
NewRef=( o(46)2212222200, 0.5 );
NewRef=( o(46)2122222200, 0.5 );
NewRef=( o(46)1222222200, 0.5 );
States
CISD(16,80,28,56,0.5);
End;
Densities
Create( 00,"FeS2N3+N3_ROHF+2CISD_00.den",true);
Create( 01,"FeS2N3+N3_ROHF+2CISD_01.den",true);
Create( 02,"FeS2N3+N3_ROHF+2CISD_02.den",true);
Create( 03,"FeS2N3+N3_ROHF+2CISD_03.den",true);
Create( 04,"FeS2N3+N3_ROHF+2CISD_04.den",true);
Create( 05,"FeS2N3+N3_ROHF+2CISD_05.den",true);
Create( 06,"FeS2N3+N3_ROHF+2CISD_06.den",true);
Create( 07,"FeS2N3+N3_ROHF+2CISD_07.den",true);
Create( 08,"FeS2N3+N3_ROHF+2CISD_08.den",true);
Create( 09,"FeS2N3+N3_ROHF+2CISD_09.den",true);
Create( 10,"FeS2N3+N3_ROHF+2CISD_10.den",true);
Create( 11,"FeS2N3+N3_ROHF+2CISD_11.den",true);
Create( 12,"FeS2N3+N3_ROHF+2CISD_12.den",true);
Create( 13,"FeS2N3+N3_ROHF+2CISD_13.den",true);
Create( 14,"FeS2N3+N3_ROHF+2CISD_14.den",true);
Create( 15,"FeS2N3+N3_ROHF+2CISD_15.den",true);
Create( 16,"FeS2N3+N3_ROHF+2CISD_16.den",true);
Create( 17,"FeS2N3+N3_ROHF+2CISD_17.den",true);
Create( 18,"FeS2N3+N3_ROHF+2CISD_18.den",true);
Create( 19,"FeS2N3+N3_ROHF+2CISD_19.den",true);
Create( 00,01,"FeS2N3+N3_ROHF+2CISD_TD01.den",true);
Create( 00,02,"FeS2N3+N3_ROHF+2CISD_TD02.den",true);
Create( 00,03,"FeS2N3+N3_ROHF+2CISD_TD03.den",true);
Create( 00,04,"FeS2N3+N3_ROHF+2CISD_TD04.den",true);
Create( 00,05,"FeS2N3+N3_ROHF+2CISD_TD05.den",true);
Create( 00,06,"FeS2N3+N3_ROHF+2CISD_TD06.den",true);
Create( 00,07,"FeS2N3+N3_ROHF+2CISD_TD07.den",true);
Create( 00,08,"FeS2N3+N3_ROHF+2CISD_TD08.den",true);
Create( 00,09,"FeS2N3+N3_ROHF+2CISD_TD09.den",true);
Create( 00,10,"FeS2N3+N3_ROHF+2CISD_TD10.den",true);
Create( 00,11,"FeS2N3+N3_ROHF+2CISD_TD11.den",true);
Create( 00,12,"FeS2N3+N3_ROHF+2CISD_TD12.den",true);
Create( 00,13,"FeS2N3+N3_ROHF+2CISD_TD13.den",true);
Create( 00,14,"FeS2N3+N3_ROHF+2CISD_TD14.den",true);
Create( 00,15,"FeS2N3+N3_ROHF+2CISD_TD15.den",true);
Create( 00,16,"FeS2N3+N3_ROHF+2CISD_TD16.den",true);
Create( 00,17,"FeS2N3+N3_ROHF+2CISD_TD17.den",true);
Create( 00,18,"FeS2N3+N3_ROHF+2CISD_TD18.den",true);
Create( 00,19,"FeS2N3+N3_ROHF+2CISD_TD19.den",true);
NatOrb("FeS2N3+N3_ROHF+2CISD_00.den","FeS2N3+N3_NatOrb00.vec");
NatOrb("FeS2N3+N3_ROHF+2CISD_01.den","FeS2N3+N3_NatOrb01.vec");
NatOrb("FeS2N3+N3_ROHF+2CISD_02.den","FeS2N3+N3_NatOrb02.vec");
NatOrb("FeS2N3+N3_ROHF+2CISD_03.den","FeS2N3+N3_NatOrb03.vec");
NatOrb("FeS2N3+N3_ROHF+2CISD_04.den","FeS2N3+N3_NatOrb04.vec");
NatOrb("FeS2N3+N3_ROHF+2CISD_05.den","FeS2N3+N3_NatOrb05.vec");
NatOrb("FeS2N3+N3_ROHF+2CISD_06.den","FeS2N3+N3_NatOrb06.vec");

```

```

NatOrb("FeS2N3+N3_ROHF+2CISD_07.den", "FeS2N3+N3_NatOrb07.vec");
NatOrb("FeS2N3+N3_ROHF+2CISD_08.den", "FeS2N3+N3_NatOrb08.vec");
NatOrb("FeS2N3+N3_ROHF+2CISD_09.den", "FeS2N3+N3_NatOrb09.vec");
NatOrb("FeS2N3+N3_ROHF+2CISD_10.den", "FeS2N3+N3_NatOrb10.vec");
NatOrb("FeS2N3+N3_ROHF+2CISD_11.den", "FeS2N3+N3_NatOrb11.vec");
NatOrb("FeS2N3+N3_ROHF+2CISD_12.den", "FeS2N3+N3_NatOrb12.vec");
NatOrb("FeS2N3+N3_ROHF+2CISD_13.den", "FeS2N3+N3_NatOrb13.vec");
NatOrb("FeS2N3+N3_ROHF+2CISD_14.den", "FeS2N3+N3_NatOrb14.vec");
NatOrb("FeS2N3+N3_ROHF+2CISD_15.den", "FeS2N3+N3_NatOrb15.vec");
NatOrb("FeS2N3+N3_ROHF+2CISD_16.den", "FeS2N3+N3_NatOrb16.vec");
NatOrb("FeS2N3+N3_ROHF+2CISD_17.den", "FeS2N3+N3_NatOrb17.vec");
NatOrb("FeS2N3+N3_ROHF+2CISD_18.den", "FeS2N3+N3_NatOrb18.vec");
NatOrb("FeS2N3+N3_ROHF+2CISD_19.den", "FeS2N3+N3_NatOrb19.vec");
NatOrb("FeS2N3+N3_ROHF+2CISD_TD01.den", "FeS2N3+N3_TD01.vec");
NatOrb("FeS2N3+N3_ROHF+2CISD_TD02.den", "FeS2N3+N3_TD02.vec");
NatOrb("FeS2N3+N3_ROHF+2CISD_TD03.den", "FeS2N3+N3_TD03.vec");
NatOrb("FeS2N3+N3_ROHF+2CISD_TD04.den", "FeS2N3+N3_TD04.vec");
NatOrb("FeS2N3+N3_ROHF+2CISD_TD05.den", "FeS2N3+N3_TD05.vec");
NatOrb("FeS2N3+N3_ROHF+2CISD_TD06.den", "FeS2N3+N3_TD06.vec");
NatOrb("FeS2N3+N3_ROHF+2CISD_TD07.den", "FeS2N3+N3_TD07.vec");
NatOrb("FeS2N3+N3_ROHF+2CISD_TD08.den", "FeS2N3+N3_TD08.vec");
NatOrb("FeS2N3+N3_ROHF+2CISD_TD09.den", "FeS2N3+N3_TD09.vec");
NatOrb("FeS2N3+N3_ROHF+2CISD_TD10.den", "FeS2N3+N3_TD10.vec");
NatOrb("FeS2N3+N3_ROHF+2CISD_TD11.den", "FeS2N3+N3_TD11.vec");
NatOrb("FeS2N3+N3_ROHF+2CISD_TD12.den", "FeS2N3+N3_TD12.vec");
NatOrb("FeS2N3+N3_ROHF+2CISD_TD13.den", "FeS2N3+N3_TD13.vec");
NatOrb("FeS2N3+N3_ROHF+2CISD_TD14.den", "FeS2N3+N3_TD14.vec");
NatOrb("FeS2N3+N3_ROHF+2CISD_TD15.den", "FeS2N3+N3_TD15.vec");
NatOrb("FeS2N3+N3_ROHF+2CISD_TD16.den", "FeS2N3+N3_TD16.vec");
NatOrb("FeS2N3+N3_ROHF+2CISD_TD17.den", "FeS2N3+N3_TD17.vec");
NatOrb("FeS2N3+N3_ROHF+2CISD_TD18.den", "FeS2N3+N3_TD18.vec");
NatOrb("FeS2N3+N3_ROHF+2CISD_TD19.den", "FeS2N3+N3_TD19.vec");
Popan("FeS2N3+N3_ROHF+2CISD_00.den", ZDO);
Popan("FeS2N3+N3_ROHF+2CISD_01.den", ZDO);
Popan("FeS2N3+N3_ROHF+2CISD_02.den", ZDO);
Popan("FeS2N3+N3_ROHF+2CISD_03.den", ZDO);
Popan("FeS2N3+N3_ROHF+2CISD_04.den", ZDO);
Popan("FeS2N3+N3_ROHF+2CISD_05.den", ZDO);
Popan("FeS2N3+N3_ROHF+2CISD_06.den", ZDO);
Popan("FeS2N3+N3_ROHF+2CISD_07.den", ZDO);
Popan("FeS2N3+N3_ROHF+2CISD_08.den", ZDO);
Popan("FeS2N3+N3_ROHF+2CISD_09.den", ZDO);
Popan("FeS2N3+N3_ROHF+2CISD_10.den", ZDO);
Popan("FeS2N3+N3_ROHF+2CISD_11.den", ZDO);
Popan("FeS2N3+N3_ROHF+2CISD_12.den", ZDO);
Popan("FeS2N3+N3_ROHF+2CISD_13.den", ZDO);
Popan("FeS2N3+N3_ROHF+2CISD_14.den", ZDO);
Popan("FeS2N3+N3_ROHF+2CISD_15.den", ZDO);
Popan("FeS2N3+N3_ROHF+2CISD_16.den", ZDO);
Popan("FeS2N3+N3_ROHF+2CISD_17.den", ZDO);
Popan("FeS2N3+N3_ROHF+2CISD_18.den", ZDO);
Popan("FeS2N3+N3_ROHF+2CISD_19.den", ZDO);
End;
[End]
[Output]
PDBFile = yes;
LOGFile = yes;
CACHEFile = yes;
PRINT[OrbCharge] = 1;
PRINT[TransitionAn] = 1;
PRINT[CIBasis] = 100;
PRINT[CIVecAn] = 50;
[End]
[Properties]
CalcGTensor = yes;
CalcUVSpc = yes;
CalcCDSpc = yes;
UVB2 = 50;
[End]

```

### (S3) Computational details for DFT and ROHF-CISD calculations for (2).

#### ADF input file (crystallographic coordinates):

```
title 'FeS2N3' Fe(III) with actual crystallographic coordinates
maxmemoryusage 512
realmemblock 1
integermemblock 1/2
logicalmemblock 1/32
stringmemblock 3/2
vectorlength 512
scf
  converge 0.000001
  mixing 0.2
  iterations 200
end
xc
  lda scf vwn
  gga energy becke perdew
end
integration 3.50
Symmetry NOSYM TOL=0.2
charge +1.00 1.00
unrestricted
restart ./adfwork/FeS2N3_LScsp.t211
Units
  Length angstrom
  Angle degrees
End
Atoms cartesian
Fe 0.000000 0.000000 0.000000
S -2.131989 0.000000 -0.059998
S 1.107986 -1.849991 0.134995
N -0.056992 0.030000 -1.965988
N 1.375992 1.512985 0.135986
N 0.000000 0.000000 1.953995
C -2.436996 -0.306000 -1.831985
C -1.170990 -0.096985 -2.601990
C 1.188995 0.186996 -2.753998
C 2.358994 0.700989 -1.962997
C 2.011993 1.911987 -1.137985
C 0.799988 2.672989 0.849991
C 0.502991 2.379990 2.293991
C -0.481995 1.262985 2.564987
C 0.440994 -0.974991 2.638992
C 1.008987 -2.181000 1.918000
H 2.004990 1.157990 0.664993
H -3.237991 0.377000 -2.149994
H -2.757996 -1.352997 -1.941986
H -1.243988 -0.086990 -3.649994
H 1.411987 -0.660995 -3.144989
H 1.015000 0.801987 -3.469986
H 2.668991 0.003998 -1.380997
H 3.071991 0.923996 -2.564987
H 1.405991 2.465988 -1.634995
H 2.801987 2.423996 -0.954987
H 1.408997 3.410995 0.791992
H -0.019989 2.928986 0.421997
H 1.330994 2.120987 2.702988
H 0.203995 3.179993 2.731995
H -1.323990 1.497986 2.170990
H -0.609985 1.140991 3.507996
H 0.435989 -0.990997 3.687988
H 2.018997 -2.415985 2.283997
H 0.336000 -3.035995 2.078995
End

Fragments
Fe ./atomic_frags/IV/Fe.3+.IV.3p.ebpvwn.t21
S ./atomic_frags/IV/S.1-.IV.2p.ebpvwn.t21
C ./atomic_frags/IV/C.00.IV.1s.ebpvwn.t21
N ./atomic_frags/IV/N.00.IV.1s.ebpvwn.t21
H ./atomic_frags/IV/H.00.IV.--.ebpvwn.t21
End
EPrint
eigval 20 10
orbpop 20 10
```

```
subend
End
LocOrb
End
EndInput
```

(LOGFILE)

```
<Jan31-2000> <01:17:30> ADF 1999 RunTime: Jan31-2000 01:17:30
<Jan31-2000> <01:17:30> 'FeS2N3' Fe(III) with actual crystallographic coordinates
<Jan31-2000> <01:17:30> RunType : SINGLE POINT
<Jan31-2000> <01:17:30> Net Charge: 1 (Nuclei minus Electrons)
<Jan31-2000> <01:17:30> Spin polar: 1 (Spin_A minus Spin_B electrons)
<Jan31-2000> <01:17:30> Symmetry : NOSYM
<Jan31-2000> <01:17:30> >>>> FRAGM
<Jan31-2000> <01:17:33> >>>> CORORT
<Jan31-2000> <01:17:34> >>>> FITINT
<Jan31-2000> <01:20:19> >>>> ORTHON
<Jan31-2000> <01:20:33> >>>> CRTP12
<Jan31-2000> <01:20:34> >>>> GENPT
<Jan31-2000> <01:20:34> Acc.Num.Int.= 3.500
<Jan31-2000> <01:20:50> Block Length= 512
<Jan31-2000> <01:20:51> >>>> PTCOR
<Jan31-2000> <01:20:53> >>>> PTBAS
<Jan31-2000> <01:25:01> >>>> CYCLE
<Jan31-2000> <01:29:55> 1
<Jan31-2000> <01:35:25> 2 ErrMat 0.00001057 MaxE1 -0.00000173
<Jan31-2000> <01:38:06> 3 ErrMat 0.00000426 MaxE1 0.00000087
<Jan31-2000> <01:38:30> SCF converged
<Jan31-2000> <01:40:58> 4 ErrMat 0.00004083 MaxE1 -0.00000924
<Jan31-2000> <01:41:37> >>>> COREPS
<Jan31-2000> <01:42:40> >>>> TOTEN
<Jan31-2000> <02:07:16> >>>> POPAN
<Jan31-2000> <02:07:17> >>>> DEBYE
<Jan31-2000> <02:07:23> >>>> AMETS
<Jan31-2000> <02:07:59> Bond Energy LDA -9.45999314 a.u.
<Jan31-2000> <02:07:59> Bond Energy LDA -257.41961605 eV
<Jan31-2000> <02:07:59> + GGA-X -8.37358370 a.u.
<Jan31-2000> <02:07:59> + GGA-X -227.85689884 eV
<Jan31-2000> <02:07:59> + GGA-XC -8.83046523 a.u.
<Jan31-2000> <02:07:59> + GGA-XC -240.28928312 eV
<Jan31-2000> <02:07:59> >>>> POPUL
<Jan31-2000> <02:08:10> >>>> LOCMO
<Jan31-2000> <02:08:16> NORMAL TERMINATION
<Jan31-2000> <02:08:16> END
STOP NORMAL TERMINATION
STOP
```

### ADF input file (optimized coordinates):

```
title 'FeS2N3' Fe(III) with actual crystallographic coordinates

maxmemoryusage 512
realmemblock 1
integermemblock 1/2
logicalmemblock 1/32
stringmemblock 3/2
vectorlength 512
scf
  converge 0.000001
  mixing 0.2
  iterations 200
end
xc
  lda scf vwn
  gga energy becke perdw
end
integration 3.25
Symmetry NOSYM TOL=0.2
charge +1.00 1.00
unrestricted
Restart FeS2N3_LSgo1.t21
Units
  Length angstrom
  Angle degrees
End
Geometry
  step rad=0.015
End
Atoms cartesian
  1 Fe 0.007332 0.066699 0.002226
  2 S -2.146927 -0.115329 -0.000105
  3 S 1.172320 -1.762886 0.075169
```

```

 4 N      -0.050007    0.052725   -1.902029
 5 N      1.395119    1.465221    0.135458
 6 N     -0.018926    0.035572    1.897491
 7 C     -2.435444   -0.249759   -1.852296
 8 C     -1.166185   -0.093195   -2.557075
 9 C      1.186640    0.086284   -2.713467
10 C      2.375369    0.646765   -1.962454
11 C      2.004267    1.866969   -1.154984
12 C      0.782018    2.627814    0.836858
13 C      0.534734    2.361138    2.305133
14 C     -0.471153    1.256095    2.569777
15 C      0.373009   -0.987496    2.591483
16 C      0.888940   -2.177542    1.907803
17 H      2.127952    1.038882    0.741333
18 H     -3.181915    0.502634   -2.167081
19 H     -2.868957   -1.249690   -2.055170
20 H     -1.154346   -0.129994   -3.658002
21 H      1.402472   -0.946806   -3.043208
22 H      0.994967    0.705339   -3.611454
23 H      2.809050   -0.119612   -1.292322
24 H      3.158481    0.905608   -2.698258
25 H      1.258134    2.481591   -1.692589
26 H      2.891469    2.498964   -0.953104
27 H      1.456097    3.501185    0.729800
28 H     -0.163861    2.863104    0.312028
29 H      1.492257    2.109798    2.804289
30 H      0.168723    3.294045    2.772345
31 H     -1.460066    1.524153    2.155503
32 H     -0.581740    1.087278    3.658561
33 H      0.307385   -0.969632    3.691784
34 H      1.831740   -2.535173    2.358711
35 H      0.155501   -3.005430    1.950051
End
Fragments
Fe      ./atomic_frags/II/Fe.3+.II.3p.ebpvwn.t21
S      ./atomic_frags/II/S.1-.II.2p.ebpvwn.t21
C      ./atomic_frags/II/C.00.II.1s.ebpvwn.t21
N      ./atomic_frags/II/N.00.II.1s.ebpvwn.t21
H      ./atomic_frags/II/H.00.II.--.ebpvwn.t21
End
EndInput

<Jan28-2000> <09:12:31> ADF 1999  RunTime: Jan28-2000 09:12:31
<Jan28-2000> <09:12:31> 'FeS2N3' Fe(III) with actual crystallographic coordinates
<Jan28-2000> <09:12:31> RunType   : GEOMETRY OPTIMIZATION
<Jan28-2000> <09:12:31> Net charge: 1 (Nuclei minus Electrons)
<Jan28-2000> <09:12:31> Spin polar: 1 (Spin_A minus Spin_B electrons)
<Jan28-2000> <09:12:31> Symmetry   : NOSYM
<Jan28-2000> <09:12:31> >>>> FRAGM
Coordinates in Geometry Cycle 1
  Atom      X      Y      Z (Angstrom)
  1.Fe      0.007332  0.066699  0.002226
  2.S      -2.146927  -0.115329  -0.000105
  3.S       1.172320  -1.762886  0.075169
  4.N      -0.050007  0.052725  -1.902029
  5.N       1.395119  1.465221  0.135458
  6.N     -0.018926  0.035572  1.897491
  7.C     -2.435444  -0.249759  -1.852296
  8.C     -1.166185  -0.093195  -2.557075
  9.C      1.186640  0.086284  -2.713467
 10.C      2.375369  0.646765  -1.962454
 11.C      2.004267  1.866969  -1.154984
 12.C      0.782018  2.627814  0.836858
 13.C      0.534734  2.361138  2.305133
 14.C     -0.471153  1.256095  2.569777
 15.C      0.373009  -0.987496  2.591483
 16.C      0.888940  -2.177542  1.907803
 17.H      2.127952  1.038882  0.741333
 18.H     -3.181915  0.502634  -2.167081
 19.H     -2.868957  -1.249690  -2.055170
 20.H     -1.154346  -0.129994  -3.658002
 21.H      1.402472  -0.946806  -3.043208
 22.H      0.994967  0.705339  -3.611454
 23.H      2.809050  -0.119612  -1.292322
 24.H      3.158481  0.905608  -2.698258
 25.H      1.258134  2.481591  -1.692589
 26.H      2.891469  2.498964  -0.953104
 27.H      1.456097  3.501185  0.729800
 28.H     -0.163861  2.863104  0.312028
 29.H      1.492257  2.109798  2.804289
 30.H      0.168723  3.294045  2.772345
 31.H     -1.460066  1.524153  2.155503
 32.H     -0.581740  1.087278  3.658561
 33.H      0.307385  -0.969632  3.691784
 34.H      1.831740  -2.535173  2.358711
 35.H      0.155501  -3.005430  1.950051
<Jan28-2000> <09:12:34> >>>> CORORT
<Jan28-2000> <09:12:35> >>>> FITINT
<Jan28-2000> <09:14:38> >>>> ORTHON

```



```

<Jan28-2000> <09:14:40> >>>> CRTP12
<Jan28-2000> <09:14:41> >>>> GENPT
<Jan28-2000> <09:14:41> Acc.Num.Int.= 3.250
<Jan28-2000> <09:15:00> Block Length= 118
<Jan28-2000> <09:15:00> >>>> PTCOR
<Jan28-2000> <09:15:03> >>>> PTBAS
<Jan28-2000> <09:15:49> >>>> CYCLE
<Jan28-2000> <09:17:20> 1
<Jan28-2000> <09:19:01> 2 ErrMat 0.01505071 MaxE1 -0.00608868
<Jan28-2000> <09:20:30> 3 ErrMat 0.01597413 MaxE1 -0.00722670
<Jan28-2000> <09:21:58> 4 ErrMat 0.00840834 MaxE1 0.00216529
<Jan28-2000> <09:23:30> 5 ErrMat 0.01342072 MaxE1 -0.00379344
<Jan28-2000> <09:25:01> 6 ErrMat 0.00811880 MaxE1 -0.00215636
<Jan28-2000> <09:26:31> 7 ErrMat 0.00358813 MaxE1 -0.00060898
<Jan28-2000> <09:26:39> SCF converged
<Jan28-2000> <09:27:59> 8 ErrMat 0.00210555 MaxE1 -0.00041504
<Jan28-2000> <09:28:10> >>>> TOTEN
<Jan28-2000> <09:35:07> >>>> POPAN
<Jan28-2000> <09:35:08> >>>> DEBYE
<Jan28-2000> <09:35:09> >>>> AMETS
<Jan28-2000> <09:35:22> >>>> FOCKC
<Jan28-2000> <09:36:18> >>>> ENGRAD
<Jan28-2000> <09:58:16> E-test: old,new= 0.00000, -10.52964 hartree
<Jan28-2000> <09:58:16> max gradient: 0.00336547 au/angstrom,radian
<Jan28-2000> <09:58:16> max cart. step: 0.00617646 angstrom
<Jan28-2000> <09:58:16> Geometry Converged
Coordinates in Geometry Cycle 2
Atom X Y Z (Angstrom)
1.Fe 0.007442 0.067339 0.001445
2.S -2.147068 -0.115211 0.000670
3.S 1.174175 -1.761985 0.075303
4.N -0.050377 0.052114 -1.902712
5.N 1.397340 1.466026 0.135633
6.N -0.019705 0.035239 1.897786
7.C -2.435688 -0.250274 -1.851064
8.C -1.167093 -0.094377 -2.557280
9.C 1.187172 0.084689 -2.712981
10.C 2.375460 0.647414 -1.962856
11.C 2.004024 1.868043 -1.156180
12.C 0.782090 2.627739 0.837332
13.C 0.535253 2.360365 2.305893
14.C -0.471354 1.255615 2.570245
15.C 0.371045 -0.988683 2.591204
16.C 0.886088 -2.178490 1.907455
17.H 2.130038 1.039432 0.740548
18.H -3.181140 0.503854 -2.164742
19.H -2.870273 -1.248785 -2.053952
20.H -1.155618 -0.133499 -3.658244
21.H 1.403359 -0.949062 -3.040029
22.H 0.995661 0.701394 -3.612371
23.H 2.809205 -0.118012 -1.292352
24.H 3.158044 0.905266 -2.698823
25.H 1.256491 2.481162 -1.693009
26.H 2.890686 2.500866 -0.956052
27.H 1.455075 3.501730 0.730229
28.H -0.164051 2.862881 0.313160
29.H 1.492569 2.109468 2.805139
30.H 0.169386 3.293245 2.772697
31.H -1.459917 1.523617 2.156359
32.H -0.581508 1.086265 3.658397
33.H 0.305344 -0.971366 3.691222
34.H 1.827136 -2.534399 2.361662
35.H 0.149325 -3.003782 1.949100
<Jan28-2000> <09:58:18> >>>> CORORT
<Jan28-2000> <09:58:18> >>>> FITINT
<Jan28-2000> <10:00:23> >>>> ORTHON
<Jan28-2000> <10:00:24> >>>> GENPT
<Jan28-2000> <10:00:24> Acc.Num.Int.= 3.250
<Jan28-2000> <10:00:41> Block Length= 118
<Jan28-2000> <10:00:42> >>>> PTCOR
<Jan28-2000> <10:00:45> >>>> PTBAS
<Jan28-2000> <10:01:31> >>>> CYCLE
<Jan28-2000> <10:03:01> 1
<Jan28-2000> <10:04:42> 2 ErrMat 0.01444798 MaxE1 -0.00309507
<Jan28-2000> <10:06:13> 3 ErrMat 0.02466906 MaxE1 0.00538259
<Jan28-2000> <10:07:43> 4 ErrMat 0.00406720 MaxE1 -0.00064074
<Jan28-2000> <10:09:10> 5 ErrMat 0.00083897 MaxE1 0.00014955
<Jan28-2000> <10:10:34> 6 ErrMat 0.00043398 MaxE1 0.00008929
<Jan28-2000> <10:11:55> 7 ErrMat 0.00016468 MaxE1 0.00003607
<Jan28-2000> <10:13:13> 8 ErrMat 0.00005311 MaxE1 -0.00001203
<Jan28-2000> <10:14:27> 9 ErrMat 0.00002205 MaxE1 -0.00000377
<Jan28-2000> <10:15:39> 10 ErrMat 0.00001138 MaxE1 -0.00000222
<Jan28-2000> <10:16:48> 11 ErrMat 0.00000632 MaxE1 0.00000122
<Jan28-2000> <10:17:53> 12 ErrMat 0.00000340 MaxE1 -0.00000062
<Jan28-2000> <10:18:02> SCF converged
<Jan28-2000> <10:18:56> 13 ErrMat 0.00000183 MaxE1 0.00000029
<Jan28-2000> <10:19:07> >>>> COREPS
<Jan28-2000> <10:19:55> >>>> TOTEN
<Jan28-2000> <10:26:45> >>>> POPAN

```

```

<Jan28-2000> <10:26:46> >>>> DEBYE
<Jan28-2000> <10:26:47> >>>> AMETS
<Jan28-2000> <10:27:01> >>>> POPUL
<Jan28-2000> <10:27:02> Bond Energy LDA -10.52970482 a.u.
<Jan28-2000> <10:27:02> Bond Energy LDA -286.52796386 eV
<Jan28-2000> <10:27:02> + GGA-X -9.42523882 a.u.
<Jan28-2000> <10:27:02> + GGA-X -256.47390247 eV
<Jan28-2000> <10:27:02> + GGA-XC -9.87910600 a.u.
<Jan28-2000> <10:27:02> + GGA-XC -268.82426193 eV
<Jan28-2000> <10:27:02> NORMAL TERMINATION
<Jan28-2000> <10:27:03> END

```

Geometry optimization followed by single-point calculation using higher integration values

```

1(INPUT FILE)
title 'FeS2N3' Fe(III) with optimized coordinates
maxmemoryusage 96
realmemblock 1
integermemblock 1/2
logicalmemblock 1/32
stringmemblock 3/2
vectorlength 512
scf
  converge 0.000001
  mixing 0.2
  iterations 200
end
xc
  lda scf vwn
  gga energy becke perdew
end
integration 3.5
Symmetry NOSYM TOL=0.2
charge +1.00 1.00
unrestricted
Restart ./adwork/FeS2N3_LSgosp.t211
Units
  Length angstrom
  Angle degrees
End
Atoms cartesian
  1 Fe 0.007442 0.067339 0.001445
  2 S -2.147068 -0.115211 0.000670
  3 S 1.174175 -1.761985 0.075303
  4 N -0.050377 0.052114 -1.902712
  5 N 1.397340 1.466026 0.135633
  6 N -0.019705 0.035239 1.897786
  7 C -2.435688 -0.250274 -1.851064
  8 C -1.167093 -0.094377 -2.557280
  9 C 1.187172 0.084689 -2.712981
  10 C 2.375460 0.647414 -1.962856
  11 C 2.004024 1.868043 -1.156180
  12 C 0.782090 2.627739 0.837332
  13 C 0.535253 2.360365 2.305893
  14 C -0.471354 1.255615 2.570245
  15 C 0.371045 -0.988683 2.591204
  16 C 0.886088 -2.178490 1.907455
  17 H 2.130038 1.039432 0.740548
  18 H -3.181140 0.503854 -2.164742
  19 H -2.870273 -1.248785 -2.053952
  20 H -1.155618 -0.133499 -3.658244
  21 H 1.403359 -0.949062 -3.040029
  22 H 0.995661 0.701394 -3.612371
  23 H 2.809205 -0.118012 -1.292352
  24 H 3.158044 0.905266 -2.698823
  25 H 1.256491 2.481162 -1.693009
  26 H 2.890686 2.500866 -0.956052
  27 H 1.455075 3.501730 0.730229
  28 H -0.164051 2.862881 0.313160
  29 H 1.492569 2.109468 2.805139
  30 H 0.169386 3.293245 2.772697
  31 H -1.459917 1.523617 2.156359
  32 H -0.581508 1.086265 3.658397
  33 H 0.305344 -0.971366 3.691222
  34 H 1.827136 -2.534399 2.361662
  35 H 0.149325 -3.003782 1.949100
End
Fragments
  Fe ./atomic_fragments/IV/Fe.3+.IV.3p.ebpvwn.t21
  S ./atomic_fragments/IV/S.1-.IV.2p.ebpvwn.t21
  C ./atomic_fragments/IV/C.00.IV.1s.ebpvwn.t21
  N ./atomic_fragments/IV/N.00.IV.1s.ebpvwn.t21
  H ./atomic_fragments/IV/H.00.IV.--.ebpvwn.t21
End
EPrint
  eigval 20 10
  orbpop 20 10
  subend
End

```

```

LocOrb
End
EndInput

```

## ROHF-CISD input file for ORCA (crystallographic coordinates)

```

# ***
# *** Model complexes for nitrile hydratase - 5C species
# *** initial geometry
[METHOD]
  Method = INDO;
  Version = ZINDO_S;
  RunTyp = Energy;
[END]
[BASIS]
  Metal3d = Gouterman;
  Metal4sp = Gouterman;
[END]
[PARAS]
  SOCPars = Standard;
  ZDOIPPar = IP_Cache;
[END]
[REDEF]
  SOCFE3d= 430;
[END]
[SCF]
  MaxIter = 1000;
  HFtyp = ROHF;
  SCFtolE = 1e-8;
  CNVRico = true;
  SCFTolErr = 1e-7;
  UHFNatOrb = true;
  Guess = MORead;
  MOInp = "FeS2N3open-LSINIT-ROHF.OUT";
[END]
[COORDS]
  ctyp = cartesian;
  charge = 1;
  mult = 2;
  coords
  #
  # Molecular Fragments:
  # (1) Fe(III) ion
  # (2) S*CH2- group
  # (3) S*CH2- group
  # (4) -CH2N*=CH- group
  # (5) -CH2CH2N*HCH2CH2- group
  # (6) -CH2N*=CH- group
  #
  # Ligand structure is broken down as follows:
  # *SCH2-CH=N*CH2-CH2CH2N*HCH2CH2-CH2N*H=CH-CH2S*
  # | 2 | 4 | 5 | 6 | 3 |
  #
  # Fragment-Fragment interactions of interest:
  # 1-2 & 1-3 = Fe-thiolate bonds
  # 1-4 & 1-6 = Fe-imine bonds
  # 1-5 = Fe-amine bond
  # 2-4 = C-C bond
  # 4-5 = C-C bond
  # 5-6 = C-C bond
  # 6-3 = C-C bond
  #
  #01# Fe(1) +3.00 .0000 .0000 .0000
  #02# S(2) -1.00 2.1958 .0000 .0000
  #03# S(3) -1.00 -.2041 0.5208 -2.1368
  #04# N(4) 0.00 .1784 1.9107 0.4788
  #05# N(5) 0.00 -2.1390 -0.2212 0.1729
  #06# N(6) 0.00 -.1284 -1.8584 -0.6396
  #07# C(2) 0.00 2.5390 1.8074 0.0000
  #08# C(4) 0.00 1.3043 2.5360 0.4731
  #09# C(4) 0.00 -1.0059 2.6349 0.9697
  #10# C(5) 0.00 -2.2884 2.2640 0.2215
  #11# C(5) 0.00 -2.8849 0.9519 0.6608
  #12# C(5) 0.00 -2.6330 -1.4337 0.8724
  #13# C(5) 0.00 -2.1484 -2.7634 0.3375
  #14# C(6) 0.00 -0.6167 -2.8679 0.3170
  #15# C(6) 0.00 .0152 -2.1918 -1.8775
  #16# C(3) 0.00 .2333 -1.0964 -2.9061
  #17# H(3) 0.00 1.2829 -1.0816 -3.2354
  #18# H(3) 0.00 -.4342 -1.2432 -3.7680
  #19# H(6) 0.00 -.0369 -3.1763 -2.2389
  #20# H(6) 0.00 -.3356 -3.7487 0.0585
  #21# H(6) 0.00 -.2792 -2.6826 1.1964
  #22# H(5) 0.00 -2.5214 -3.4843 0.8500
  #23# H(5) 0.00 -2.4558 -2.8556 -0.5671
  #24# H(5) 0.00 -2.3671 -1.3735 1.7927

```

```

#25# H(5) 0.00 -3.5927 -1.4336 0.8474
#26# H(5) 0.00 -2.4254 -0.3250 -0.6740
#27# H(5) 0.00 -3.7806 0.9016 0.3194
#28# H(5) 0.00 -2.9311 0.9149 1.6191
#29# H(5) 0.00 -2.0848 2.2220 -0.7158
#30# H(5) 0.00 -2.9345 2.9628 0.3469
#31# H(4) 0.00 -1.1265 2.4389 1.9016
#32# H(4) 0.00 -0.8489 3.5780 0.8842
#33# H(4) 0.00 1.4267 3.5362 0.7683
#34# H(2) 0.00 3.3929 1.9806 0.6715
#35# H(2) 0.00 2.7950 2.1573 -1.0110
end;
[END]
[CI]
CITYp = Rumer;
UseSym = no;
NVecs = 35;
Reduce = yes;
MaxE = 75000;
MaxT = 1000;
NSelec = -1;
CIDiag = Givens;
RootE = 75000;
Flags = 1,1,0,0,0,1;
NewRef=( o(41)2222100, 0.5 );
NewRef=( o(41)2222010, 0.5 );
NewRef=( o(41)22212110, 0.5 );
NewRef=( o(41)22122110, 0.5 );
NewRef=( o(41)22212200, 0.5 );
NewRef=( o(41)22122200, 0.5 );
States
  CISD(10,76,26,48,0.5);
End;
Densities
  Create( 00, "FeS2N3open_ROHF+2CISD_00.den", true);
  Create( 01, "FeS2N3open_ROHF+2CISD_01.den", true);
  Create( 02, "FeS2N3open_ROHF+2CISD_02.den", true);
  Create( 03, "FeS2N3open_ROHF+2CISD_03.den", true);
  Create( 04, "FeS2N3open_ROHF+2CISD_04.den", true);
  Create( 05, "FeS2N3open_ROHF+2CISD_05.den", true);
  Create( 06, "FeS2N3open_ROHF+2CISD_06.den", true);
  Create( 07, "FeS2N3open_ROHF+2CISD_07.den", true);
  Create( 08, "FeS2N3open_ROHF+2CISD_08.den", true);
  Create( 09, "FeS2N3open_ROHF+2CISD_09.den", true);
  Create( 10, "FeS2N3open_ROHF+2CISD_10.den", true);
  Create( 11, "FeS2N3open_ROHF+2CISD_11.den", true);
  Create( 12, "FeS2N3open_ROHF+2CISD_12.den", true);
  Create( 13, "FeS2N3open_ROHF+2CISD_13.den", true);
  Create( 14, "FeS2N3open_ROHF+2CISD_14.den", true);
  Create( 15, "FeS2N3open_ROHF+2CISD_15.den", true);
  Create( 16, "FeS2N3open_ROHF+2CISD_16.den", true);
  Create( 17, "FeS2N3open_ROHF+2CISD_17.den", true);
  Create( 18, "FeS2N3open_ROHF+2CISD_18.den", true);
  Create( 19, "FeS2N3open_ROHF+2CISD_19.den", true);
  Create( 00,01, "FeS2N3open_ROHF+2CISD_TD01.den", true);
  Create( 00,02, "FeS2N3open_ROHF+2CISD_TD02.den", true);
  Create( 00,03, "FeS2N3open_ROHF+2CISD_TD03.den", true);
  Create( 00,04, "FeS2N3open_ROHF+2CISD_TD04.den", true);
  Create( 00,05, "FeS2N3open_ROHF+2CISD_TD05.den", true);
  Create( 00,06, "FeS2N3open_ROHF+2CISD_TD06.den", true);
  Create( 00,07, "FeS2N3open_ROHF+2CISD_TD07.den", true);
  Create( 00,08, "FeS2N3open_ROHF+2CISD_TD08.den", true);
  Create( 00,09, "FeS2N3open_ROHF+2CISD_TD09.den", true);
  Create( 00,10, "FeS2N3open_ROHF+2CISD_TD10.den", true);
  Create( 00,11, "FeS2N3open_ROHF+2CISD_TD11.den", true);
  Create( 00,12, "FeS2N3open_ROHF+2CISD_TD12.den", true);
  Create( 00,13, "FeS2N3open_ROHF+2CISD_TD13.den", true);
  Create( 00,14, "FeS2N3open_ROHF+2CISD_TD14.den", true);
  Create( 00,15, "FeS2N3open_ROHF+2CISD_TD15.den", true);
  Create( 00,16, "FeS2N3open_ROHF+2CISD_TD16.den", true);
  Create( 00,17, "FeS2N3open_ROHF+2CISD_TD17.den", true);
  Create( 00,18, "FeS2N3open_ROHF+2CISD_TD18.den", true);
  Create( 00,19, "FeS2N3open_ROHF+2CISD_TD19.den", true);
  NatOrb("FeS2N3open_ROHF+2CISD_00.den", "FeS2N3open_NatOrb00.vec");
  NatOrb("FeS2N3open_ROHF+2CISD_01.den", "FeS2N3open_NatOrb01.vec");
  NatOrb("FeS2N3open_ROHF+2CISD_02.den", "FeS2N3open_NatOrb02.vec");
  NatOrb("FeS2N3open_ROHF+2CISD_03.den", "FeS2N3open_NatOrb03.vec");
  NatOrb("FeS2N3open_ROHF+2CISD_04.den", "FeS2N3open_NatOrb04.vec");
  NatOrb("FeS2N3open_ROHF+2CISD_05.den", "FeS2N3open_NatOrb05.vec");
  NatOrb("FeS2N3open_ROHF+2CISD_06.den", "FeS2N3open_NatOrb06.vec");
  NatOrb("FeS2N3open_ROHF+2CISD_07.den", "FeS2N3open_NatOrb07.vec");
  NatOrb("FeS2N3open_ROHF+2CISD_08.den", "FeS2N3open_NatOrb08.vec");
  NatOrb("FeS2N3open_ROHF+2CISD_09.den", "FeS2N3open_NatOrb09.vec");
  NatOrb("FeS2N3open_ROHF+2CISD_10.den", "FeS2N3open_NatOrb10.vec");
  NatOrb("FeS2N3open_ROHF+2CISD_11.den", "FeS2N3open_NatOrb11.vec");
  NatOrb("FeS2N3open_ROHF+2CISD_12.den", "FeS2N3open_NatOrb12.vec");
  NatOrb("FeS2N3open_ROHF+2CISD_13.den", "FeS2N3open_NatOrb13.vec");
  NatOrb("FeS2N3open_ROHF+2CISD_14.den", "FeS2N3open_NatOrb14.vec");
  NatOrb("FeS2N3open_ROHF+2CISD_15.den", "FeS2N3open_NatOrb15.vec");

```

```

NatOrb("FeS2N3open_ROHF+2CISD_16.den", "FeS2N3open_NatOrb16.vec");
NatOrb("FeS2N3open_ROHF+2CISD_17.den", "FeS2N3open_NatOrb17.vec");
NatOrb("FeS2N3open_ROHF+2CISD_18.den", "FeS2N3open_NatOrb18.vec");
NatOrb("FeS2N3open_ROHF+2CISD_19.den", "FeS2N3open_NatOrb19.vec");
NatOrb("FeS2N3open_ROHF+2CISD_TD01.den", "FeS2N3open_TD01.vec");
NatOrb("FeS2N3open_ROHF+2CISD_TD02.den", "FeS2N3open_TD02.vec");
NatOrb("FeS2N3open_ROHF+2CISD_TD03.den", "FeS2N3open_TD03.vec");
NatOrb("FeS2N3open_ROHF+2CISD_TD04.den", "FeS2N3open_TD04.vec");
NatOrb("FeS2N3open_ROHF+2CISD_TD05.den", "FeS2N3open_TD05.vec");
NatOrb("FeS2N3open_ROHF+2CISD_TD06.den", "FeS2N3open_TD06.vec");
NatOrb("FeS2N3open_ROHF+2CISD_TD07.den", "FeS2N3open_TD07.vec");
NatOrb("FeS2N3open_ROHF+2CISD_TD08.den", "FeS2N3open_TD08.vec");
NatOrb("FeS2N3open_ROHF+2CISD_TD09.den", "FeS2N3open_TD09.vec");
NatOrb("FeS2N3open_ROHF+2CISD_TD10.den", "FeS2N3open_TD10.vec");
NatOrb("FeS2N3open_ROHF+2CISD_TD11.den", "FeS2N3open_TD11.vec");
NatOrb("FeS2N3open_ROHF+2CISD_TD12.den", "FeS2N3open_TD12.vec");
NatOrb("FeS2N3open_ROHF+2CISD_TD13.den", "FeS2N3open_TD13.vec");
NatOrb("FeS2N3open_ROHF+2CISD_TD14.den", "FeS2N3open_TD14.vec");
NatOrb("FeS2N3open_ROHF+2CISD_TD15.den", "FeS2N3open_TD15.vec");
NatOrb("FeS2N3open_ROHF+2CISD_TD16.den", "FeS2N3open_TD16.vec");
NatOrb("FeS2N3open_ROHF+2CISD_TD17.den", "FeS2N3open_TD17.vec");
NatOrb("FeS2N3open_ROHF+2CISD_TD18.den", "FeS2N3open_TD18.vec");
NatOrb("FeS2N3open_ROHF+2CISD_TD19.den", "FeS2N3open_TD19.vec");
Popan("FeS2N3open_ROHF+2CISD_00.den", ZDO);
Popan("FeS2N3open_ROHF+2CISD_01.den", ZDO);
Popan("FeS2N3open_ROHF+2CISD_02.den", ZDO);
Popan("FeS2N3open_ROHF+2CISD_03.den", ZDO);
Popan("FeS2N3open_ROHF+2CISD_04.den", ZDO);
Popan("FeS2N3open_ROHF+2CISD_05.den", ZDO);
Popan("FeS2N3open_ROHF+2CISD_06.den", ZDO);
Popan("FeS2N3open_ROHF+2CISD_07.den", ZDO);
Popan("FeS2N3open_ROHF+2CISD_08.den", ZDO);
Popan("FeS2N3open_ROHF+2CISD_09.den", ZDO);
Popan("FeS2N3open_ROHF+2CISD_10.den", ZDO);
Popan("FeS2N3open_ROHF+2CISD_11.den", ZDO);
Popan("FeS2N3open_ROHF+2CISD_12.den", ZDO);
Popan("FeS2N3open_ROHF+2CISD_13.den", ZDO);
Popan("FeS2N3open_ROHF+2CISD_14.den", ZDO);
Popan("FeS2N3open_ROHF+2CISD_15.den", ZDO);
Popan("FeS2N3open_ROHF+2CISD_16.den", ZDO);
Popan("FeS2N3open_ROHF+2CISD_17.den", ZDO);
Popan("FeS2N3open_ROHF+2CISD_18.den", ZDO);
Popan("FeS2N3open_ROHF+2CISD_19.den", ZDO);
End;
[End]
[Output]
PDBFile = yes;
LOGFile = yes;
CACHeFile = yes;
PRINT[OrbCharge] = 1;
PRINT[TransitionAn] = 1;
PRINT[CIBasis] = 100;
PRINT[CIVecAn] = 50;
[End]
[Properties]
CalcGTensor = yes;
CalcUVSpc = yes;
CalcCDSpc = yes;
UVB2 = 50;
[End]

```

(S4) Comparison of the LT-Abs spectra of **1** and **2** in the solid state and in acetonitrile.

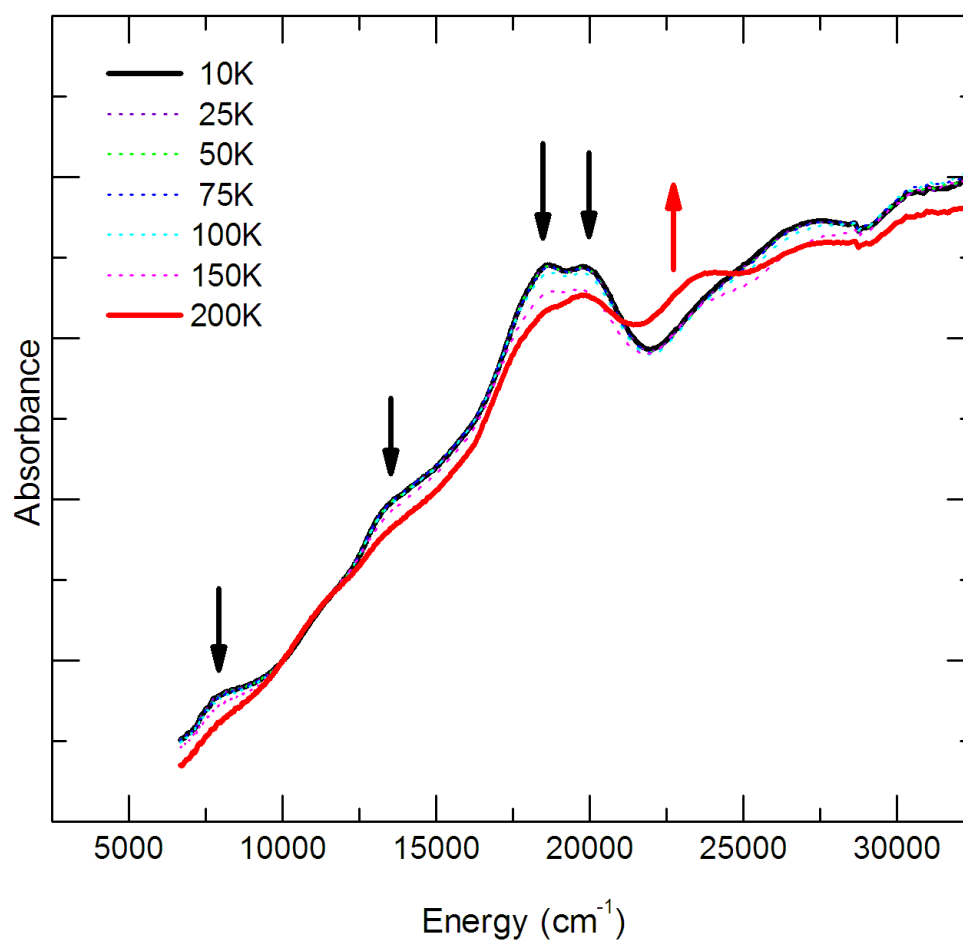

## (S5) Computational details for DFT calculations on a truncated version of (1).

### ADF Input File

```
title FeS2N3+N3 6-coordinate model with optimized ligand
symmetry nosym
charge 0.00 1.00
unrestricted
restart ./adfwork/FeS2N3+N3_geomopt.t13
units
  length angstrom
  angle degrees
end
geometry
end
geovar
r2      2.19580627
r3      1.83968984
a3     100.75014167
r4      1.50967087
a4     108.75909006
t4     19.32897022
r5      1.97780001
a5     84.82388415
t5    -14.06854596
r6      1.47239184
a6     118.90084043
t6    -174.93767783
r7      1.53042673
a7     113.07234189
t7    -39.94960690
r8      1.50676531
a8     113.59162337
t8     78.39859890
r9      2.15737769
a9     99.73515681
t9     174.01986324
r10     1.48439419
a10    116.83804838
t10   -131.37986027
r11     1.51295269
a11    116.40453904
t11   -55.15687830
r12     1.53537132
a12    112.58608206
t12    56.74796912
r13     1.96954003
a13    93.73924800
t13    175.07699013
r14     1.29011391
a14    123.24680041
t14    170.29889405
r15     1.51834984
a15    118.65452998
t15    -2.79827098
r16     2.20878114
a16    95.30124231
t16    90.37115880
r17     1.10010430
a17    109.84257841
t17   -120.79320982
r18     1.10002481
a18    107.46196218
t18    119.25057548
r19     1.04995593
a19    124.54594521
t19   -178.01769866
r20     .96000990
a20    110.89243523
t20    121.17113446
r21     .95995073
a21    110.23880549
t21   -118.38329903
r22     .95998246
a22    110.28702003
t22    123.41048136
r23     .95985759
a23    108.36110958
t23   -118.74786847
r24     .95988198
a24    107.95935458
t24    121.29252928
r25     .96006692
a25    108.68144325
t25   -122.31627107
r26     .90008396
a26    104.58636931
```

```

t26 114.20256829
r27 .95988808
a27 108.23232034
t27 119.95763070
r28 .96010380
a28 108.91874901
t28 -122.93315238
r29 .96002791
a29 108.06668270
t29 -121.45413400
r30 .95995375
a30 108.88715460
t30 121.96006674
r31 .95998151
a31 108.92532819
t31 120.89757765
r32 .95992637
a32 108.78845500
t32 -121.70979660
r33 1.05006127
a33 124.27957418
t33 179.26185041
r34 1.10002168
a34 107.42599448
t34 120.89665329
r35 1.10001056
a35 110.85106964
t35 -119.76640896
r36 2.06067192
a36 91.28254656
t36 -179.02332923
r37 1.18861126
a37 118.52112884
t37 52.33819984
r38 1.16219438
a38 140.09790437
t38 179.61021209

```

end

atoms z-matrix

```

1 Fe 0 0 0 0.0 0.0 0.0
2 S 1 0 0 r2 0.0 0.0
3 C 2 1 0 r3 a3 0.0
4 C 3 2 1 r4 a4 t4
5 N 1 2 3 r5 a5 t5
6 C 5 1 4 r6 a6 t6
7 C 6 5 1 r7 a7 t7
8 C 7 6 5 r8 a8 t8
9 N 1 5 2 r9 a9 t9
10 C 9 1 8 r10 a10 t10
11 C 10 9 1 r11 a11 t11
12 C 11 10 9 r12 a12 t12
13 N 1 2 5 r13 a13 t13
14 C 13 1 12 r14 a14 t14
15 C 14 13 1 r15 a15 t15
16 S 1 2 5 r16 a16 t16
17 H 15 16 14 r17 a17 t17
18 H 15 16 14 r18 a18 t18
19 H 14 13 15 r19 a19 t19
20 H 12 13 11 r20 a20 t20
21 H 12 13 11 r21 a21 t21
22 H 11 10 12 r22 a22 t22
23 H 11 10 12 r23 a23 t23
24 H 10 9 11 r24 a24 t24
25 H 10 9 11 r25 a25 t25
26 H 9 1 8 r26 a26 t26
27 H 8 9 7 r27 a27 t27
28 H 8 9 7 r28 a28 t28
29 H 7 6 8 r29 a29 t29
30 H 7 6 8 r30 a30 t30
31 H 6 5 7 r31 a31 t31
32 H 6 5 7 r32 a32 t32
33 H 4 5 3 r33 a33 t33
34 H 3 2 4 r34 a34 t34
35 H 3 2 4 r35 a35 t35
36 N 1 2 16 r36 a36 t36
37 N 36 1 2 r37 a37 t37
38 N 37 1 36 r38 a38 t38

```

End

fragments

```

Fe ./atomic_fragments/IV/Fe.3+.IV.2p.ebpvwn.t21
S ./atomic_fragments/IV/S.1-.IV.2p.ebpvwn.t21
N ./atomic_fragments/IV/N.00.IV.1s.ebpvwn.t21
C ./atomic_fragments/IV/C.00.IV.1s.ebpvwn.t21
H ./atomic_fragments/IV/H.00.IV.--.ebpvwn.t21

```

end

end input

```

<Apr18-2000> <20:00:40> ADF 1999 RunTime: Apr18-2000 20:00:40
<Apr18-2000> <20:00:40> FeS2N3+N3 6-coordinate model with optimized ligand

```



```

<Apr18-2000> <20:00:40> RunType : GEOMETRY OPTIMIZATION
<Apr18-2000> <20:00:41> Net Charge: 0 (Nuclei minus Electrons)
<Apr18-2000> <20:00:41> Spin polar: 1 (Spin_A minus Spin_B electrons)
<Apr18-2000> <20:00:41> Symmetry : NOSYM
<Apr18-2000> <20:00:42> >>>> FRAGM

```

```

Coordinates in Geometry Cycle 1

```

| Atom | X         | Y         | Z (Angstrom) |
|------|-----------|-----------|--------------|
| 1.Fe | 0.005095  | -0.019561 | 0.017335     |
| 2.S  | 2.212439  | -0.041697 | -0.075062    |
| 3.C  | 2.488080  | 1.769650  | -0.205971    |
| 4.C  | 1.293484  | 2.497044  | 0.288391     |
| 5.N  | 0.166431  | 1.886967  | 0.458340     |
| 6.C  | -0.958099 | 2.682573  | 0.976442     |
| 7.C  | -2.293570 | 2.340992  | 0.313866     |
| 8.C  | -2.867622 | 1.000737  | 0.762685     |
| 9.N  | -2.156258 | -0.176643 | 0.214004     |
| 10.C | -2.622142 | -1.401376 | 0.921539     |
| 11.C | -2.142291 | -2.724560 | 0.322318     |
| 12.C | -0.616507 | -2.899388 | 0.258661     |
| 13.N | -0.076670 | -1.854373 | -0.613498    |
| 14.C | 0.150810  | -2.135835 | -1.855816    |
| 15.C | 0.456161  | -1.039712 | -2.813860    |
| 16.S | -0.266025 | 0.533644  | -2.162975    |
| 17.H | 1.549211  | -0.894214 | -2.878164    |
| 18.H | 0.079878  | -1.278083 | -3.819121    |
| 19.H | 0.074493  | -3.176794 | -2.201492    |
| 20.H | -0.364909 | -3.897509 | -0.133607    |
| 21.H | -0.176112 | -2.769979 | 1.254284     |
| 22.H | -2.560627 | -3.533642 | 0.941609     |
| 23.H | -2.553543 | -2.853278 | -0.693631    |
| 24.H | -2.250109 | -1.309415 | 1.950737     |
| 25.H | -3.727280 | -1.404707 | 0.947664     |
| 26.H | -2.358945 | -0.241528 | -0.794142    |
| 27.H | -3.939041 | 0.940514  | 0.498225     |
| 28.H | -2.802208 | 0.929524  | 1.859219     |
| 29.H | -2.197345 | 2.378347  | -0.782800    |
| 30.H | -3.012735 | 3.125897  | 0.595943     |
| 31.H | -1.022714 | 2.482390  | 2.058194     |
| 32.H | -0.736617 | 3.753814  | 0.848359     |
| 33.H | 1.365401  | 3.573779  | 0.500244     |
| 34.H | 3.383379  | 2.073097  | 0.357539     |
| 35.H | 2.650339  | 2.040426  | -1.264964    |
| 36.N | -0.037765 | -0.533909 | 1.994463     |
| 37.N | 0.485317  | 0.180213  | 2.822087     |
| 38.N | 0.973507  | 0.869503  | 3.628612     |

```

Z-matrix coordinates

```

| Atom | i  | j  | k  | R (Ang)  | BondAngle  | Dihedral    |
|------|----|----|----|----------|------------|-------------|
| 1.Fe | 0  | 0  | 0  | 0.000000 | 0.000000   | 0.000000    |
| 2.S  | 1  | 0  | 0  | 2.209387 | 0.000000   | 0.000000    |
| 3.C  | 2  | 1  | 0  | 1.836871 | 98.222740  | 0.000000    |
| 4.C  | 4  | 2  | 1  | 1.483427 | 109.812354 | 20.551466   |
| 5.N  | 1  | 2  | 4  | 1.963508 | 86.389697  | -16.958126  |
| 6.C  | 14 | 1  | 5  | 1.471730 | 122.764640 | 179.538754  |
| 7.C  | 6  | 14 | 1  | 1.529433 | 113.200097 | -39.182715  |
| 8.C  | 7  | 6  | 14 | 1.525536 | 113.411538 | 73.442433   |
| 9.N  | 1  | 14 | 2  | 2.175959 | 97.551139  | 176.169106  |
| 10.C | 15 | 1  | 8  | 1.489169 | 114.397367 | -129.350156 |
| 11.C | 9  | 15 | 1  | 1.529752 | 115.285411 | -55.958136  |
| 12.C | 10 | 9  | 15 | 1.537087 | 115.212477 | 59.220337   |
| 13.N | 1  | 2  | 14 | 1.941951 | 91.089478  | 174.147399  |
| 14.C | 16 | 1  | 11 | 1.293956 | 120.663778 | 169.632662  |
| 15.C | 12 | 16 | 1  | 1.487472 | 119.614964 | -0.999325   |
| 16.S | 1  | 2  | 14 | 2.265678 | 94.689449  | 89.063380   |
| 17.H | 13 | 3  | 12 | 1.104564 | 107.147763 | -118.507580 |
| 18.H | 13 | 3  | 12 | 1.099527 | 111.872832 | 122.940808  |
| 19.H | 12 | 16 | 13 | 1.099505 | 119.708094 | -177.403726 |
| 20.H | 11 | 16 | 10 | 1.101553 | 110.508612 | 120.567988  |
| 21.H | 11 | 16 | 10 | 1.096339 | 107.973093 | -119.339380 |
| 22.H | 10 | 9  | 11 | 1.101426 | 107.217515 | 120.826332  |
| 23.H | 10 | 9  | 11 | 1.103562 | 110.157737 | -123.221376 |
| 24.H | 9  | 15 | 10 | 1.098232 | 105.688650 | 121.031584  |
| 25.H | 9  | 15 | 10 | 1.105451 | 109.054480 | -122.538206 |
| 26.H | 15 | 1  | 8  | 1.030365 | 96.402123  | 114.588813  |
| 27.H | 8  | 15 | 7  | 1.105217 | 109.491922 | 123.801455  |
| 28.H | 8  | 15 | 7  | 1.100790 | 106.802731 | -120.671337 |
| 29.H | 7  | 6  | 8  | 1.101513 | 110.331936 | -125.005644 |
| 30.H | 7  | 6  | 8  | 1.101291 | 107.461623 | 118.992454  |
| 31.H | 6  | 14 | 7  | 1.102014 | 106.987580 | 120.684616  |
| 32.H | 6  | 14 | 7  | 1.101370 | 109.342170 | -123.045488 |
| 33.H | 5  | 14 | 4  | 1.099733 | 119.585580 | 179.174174  |
| 34.H | 4  | 2  | 5  | 1.100539 | 110.945508 | 122.372374  |
| 35.H | 4  | 2  | 5  | 1.105040 | 109.388025 | -118.980155 |
| 36.N | 1  | 2  | 3  | 2.043386 | 93.376557  | 179.492632  |
| 37.N | 17 | 1  | 2  | 1.211837 | 120.226479 | 60.370671   |
| 38.N | 18 | 1  | 17 | 1.167875 | 142.252963 | -178.781694 |

```

<Apr18-2000> <20:00:44> >>>> CORORT
<Apr18-2000> <20:00:45> >>>> FITINT
<Apr18-2000> <20:04:17> >>>> ORTHON
<Apr18-2000> <20:04:38> >>>> CRTP12

```

```

<Apr18-2000> <20:04:40> >>>> GENPT
<Apr18-2000> <20:04:40> Acc.Num.Int.= 4.000
<Apr18-2000> <20:05:02> Block Length= 87
<Apr18-2000> <20:05:03> >>>> PTCOR
<Apr18-2000> <20:05:07> >>>> PTBAS
<Apr18-2000> <20:10:17> >>>> CYCLE
<Apr18-2000> <20:20:01> 1
<Apr18-2000> <20:30:33> 2 ErrMat 0.00090022 MaxE1 -0.00017457
<Apr18-2000> <20:30:59> SCF converged
<Apr18-2000> <20:38:34> 3 ErrMat 0.00154990 MaxE1 0.00027585
<Apr18-2000> <20:39:17> >>>> TOTEN
<Apr18-2000> <21:09:56> >>>> POPAN
<Apr18-2000> <21:09:58> >>>> DEBYE
<Apr18-2000> <21:10:05> >>>> AMETS
<Apr18-2000> <21:10:46> >>>> FOCKC
<Apr18-2000> <21:15:46> >>>> ENGRAD
<Apr18-2000> <22:16:44> E-test: old,new= 0.00000, -10.10434 hartree
<Apr18-2000> <22:16:44> max gradient: 0.00841027 au/angstrom,radian
<Apr18-2000> <22:16:44> max bond step: 0.00377056 angstrom
<Apr18-2000> <22:16:44> max angular step: 0.47747550 degree
<Apr18-2000> <22:16:44> Geometry Converged

```

Coordinates in Geometry Cycle 2

| Atom | X         | Y         | Z (Angstrom) |
|------|-----------|-----------|--------------|
| 1.Fe | 0.006023  | -0.019714 | 0.018986     |
| 2.S  | 2.214077  | -0.040580 | -0.076845    |
| 3.C  | 2.483910  | 1.770833  | -0.219474    |
| 4.C  | 1.292172  | 2.498139  | 0.280418     |
| 5.N  | 0.167989  | 1.887464  | 0.458388     |
| 6.C  | -0.955170 | 2.681603  | 0.981675     |
| 7.C  | -2.292852 | 2.342638  | 0.322648     |
| 8.C  | -2.868691 | 1.001665  | 0.768242     |
| 9.N  | -2.155876 | -0.174238 | 0.215293     |
| 10.C | -2.623853 | -1.399726 | 0.920044     |
| 11.C | -2.145860 | -2.722729 | 0.319563     |
| 12.C | -0.620043 | -2.899074 | 0.260251     |
| 13.N | -0.075861 | -1.855222 | -0.612592    |
| 14.C | 0.155484  | -2.135487 | -1.854771    |
| 15.C | 0.466963  | -1.040467 | -2.810672    |
| 16.S | -0.266592 | 0.531836  | -2.165475    |
| 17.H | 1.560361  | -0.894455 | -2.865167    |
| 18.H | 0.099101  | -1.279259 | -3.818972    |
| 19.H | 0.079447  | -3.175634 | -2.203060    |
| 20.H | -0.370927 | -3.898120 | -0.131330    |
| 21.H | -0.179836 | -2.769720 | 1.256087     |
| 22.H | -2.568212 | -3.531436 | 0.936632     |
| 23.H | -2.555621 | -2.850029 | -0.697340    |
| 24.H | -2.253652 | -1.310779 | 1.950360     |
| 25.H | -3.729151 | -1.401899 | 0.945248     |
| 26.H | -2.356636 | -0.237729 | -0.793420    |
| 27.H | -3.940188 | 0.942518  | 0.503273     |
| 28.H | -2.803216 | 0.928090  | 1.864676     |
| 29.H | -2.199874 | 2.383908  | -0.774317    |
| 30.H | -3.011194 | 3.126403  | 0.610171     |
| 31.H | -1.017390 | 2.480716  | 2.063629     |
| 32.H | -0.732944 | 3.752902  | 0.854213     |
| 33.H | 1.365086  | 3.575159  | 0.489587     |
| 34.H | 3.384514  | 2.079334  | 0.332670     |
| 35.H | 2.635694  | 2.036124  | -1.281405    |
| 36.N | -0.034948 | -0.538237 | 1.992233     |
| 37.N | 0.481012  | 0.178059  | 2.822593     |
| 38.N | 0.962527  | 0.868632  | 3.631747     |

Z-matrix coordinates

| Atom | i  | j  | k  | R (Ang)  | BondAngle  | Dihedral    |
|------|----|----|----|----------|------------|-------------|
| 1.Fe | 0  | 0  | 0  | 0.000000 | 0.000000   | 0.000000    |
| 2.S  | 1  | 0  | 0  | 2.210231 | 0.000000   | 0.000000    |
| 3.C  | 2  | 1  | 0  | 1.836946 | 98.094383  | 0.000000    |
| 4.C  | 4  | 2  | 1  | 1.482937 | 109.841018 | 20.919949   |
| 5.N  | 1  | 2  | 4  | 1.963832 | 86.357902  | -17.278397  |
| 6.C  | 14 | 1  | 5  | 1.471724 | 122.727556 | 179.418641  |
| 7.C  | 6  | 14 | 1  | 1.529250 | 113.248913 | -39.405077  |
| 8.C  | 7  | 6  | 14 | 1.525894 | 113.518814 | 73.456454   |
| 9.N  | 1  | 14 | 2  | 2.176286 | 97.510185  | 176.292456  |
| 10.C | 15 | 1  | 8  | 1.489126 | 114.412839 | -129.277484 |
| 11.C | 9  | 15 | 1  | 1.529508 | 115.330098 | -55.913418  |
| 12.C | 10 | 9  | 15 | 1.537118 | 115.125389 | 59.327420   |
| 13.N | 1  | 2  | 14 | 1.942855 | 91.093868  | 174.088131  |
| 14.C | 16 | 1  | 11 | 1.294248 | 120.600410 | 169.651806  |
| 15.C | 12 | 16 | 1  | 1.486552 | 119.676623 | -0.905455   |
| 16.S | 1  | 2  | 14 | 2.269448 | 94.621070  | 89.086236   |
| 17.H | 13 | 3  | 12 | 1.104449 | 107.290908 | -118.453157 |
| 18.H | 13 | 3  | 12 | 1.099551 | 111.808760 | 122.891706  |
| 19.H | 12 | 16 | 13 | 1.099542 | 119.768918 | -177.485040 |
| 20.H | 11 | 16 | 10 | 1.101584 | 110.505603 | 120.411092  |
| 21.H | 11 | 16 | 10 | 1.096450 | 107.928526 | -119.491806 |
| 22.H | 10 | 9  | 11 | 1.101437 | 107.176302 | 120.838021  |
| 23.H | 10 | 9  | 11 | 1.103722 | 110.209809 | -123.296127 |
| 24.H | 9  | 15 | 10 | 1.098413 | 105.745589 | 121.078559  |
| 25.H | 9  | 15 | 10 | 1.105587 | 109.061759 | -122.531313 |
| 26.H | 15 | 1  | 8  | 1.030455 | 96.293036  | 114.731049  |

```

27.H      8 15 7 1.105357 109.531763 123.792490
28.H      8 15 7 1.100848 106.855392 -120.604368
29.H      7 6 8 1.101672 110.302594 -125.061226
30.H      7 6 8 1.101350 107.474961 118.912510
31.H      6 14 7 1.102203 107.083360 120.762187
32.H      6 14 7 1.101505 109.250003 -122.991001
33.H      5 14 4 1.099564 119.642890 179.201566
34.H      4 2 5 1.100511 110.957928 122.536791
35.H      4 2 5 1.105041 109.361559 -118.916626
36.N      1 2 3 2.040649 93.415964 179.287001
37.N     17 1 2 1.211937 120.251267 60.848146
38.N     18 1 17 1.167681 142.309565 -178.820303
<Apr18-2000> <22:16:46> >>>> CORORT
<Apr18-2000> <22:16:47> >>>> FITINT
<Apr18-2000> <22:19:37> >>>> ORTHON
<Apr18-2000> <22:19:53> >>>> GENPT
<Apr18-2000> <22:19:53> Acc.Num.Int.= 4.000
<Apr18-2000> <22:20:10> Block Length= 87
<Apr18-2000> <22:20:11> >>>> PTCOR
<Apr18-2000> <22:20:14> >>>> PTBAS
<Apr18-2000> <22:24:16> >>>> CYCLE
<Apr18-2000> <22:31:58> 1
<Apr18-2000> <22:41:16> 2 ErrMat 0.00554322 MaxE1 0.00066399
<Apr18-2000> <22:48:35> 3 ErrMat 0.00463745 MaxE1 0.00066362
<Apr18-2000> <22:56:34> 4 ErrMat 0.01806760 MaxE1 -0.00306233
<Apr18-2000> <23:04:35> 5 ErrMat 0.00532028 MaxE1 -0.00100432
<Apr18-2000> <23:12:10> 6 ErrMat 0.00124088 MaxE1 0.00017099
<Apr18-2000> <23:19:27> 7 ErrMat 0.00044399 MaxE1 0.00004329
<Apr18-2000> <23:26:23> 8 ErrMat 0.00012404 MaxE1 0.00002407
<Apr18-2000> <23:32:51> 9 ErrMat 0.00006107 MaxE1 0.00000683
<Apr18-2000> <23:39:06> 10 ErrMat 0.00227477 MaxE1 -0.00062612
<Apr18-2000> <23:44:00> 11 ErrMat 0.00006071 MaxE1 -0.00000796
<Apr18-2000> <23:50:06> 12 ErrMat 0.00003052 MaxE1 0.00000660
<Apr18-2000> <23:55:49> 13 ErrMat 0.00000693 MaxE1 0.00000089
<Apr19-2000> <00:01:14> 14 ErrMat 0.00000678 MaxE1 0.00000105
<Apr19-2000> <00:06:31> 15 ErrMat 0.00000384 MaxE1 -0.00000045
<Apr19-2000> <00:11:40> 16 ErrMat 0.00000577 MaxE1 -0.00000095
<Apr19-2000> <00:16:38> 17 ErrMat 0.00000235 MaxE1 -0.00000044
<Apr19-2000> <00:21:48> 18 ErrMat 0.00000280 MaxE1 -0.00000043
<Apr19-2000> <00:26:58> 19 ErrMat 0.00000173 MaxE1 -0.00000043
<Apr19-2000> <00:31:52> 20 ErrMat 0.00000183 MaxE1 -0.00000043
<Apr19-2000> <00:36:50> 21 ErrMat 0.00000065 MaxE1 0.00000009
<Apr19-2000> <00:37:14> SCF converged
<Apr19-2000> <00:41:33> 22 ErrMat 0.00000068 MaxE1 -0.00000017
<Apr19-2000> <00:42:12> >>>> COREPS
<Apr19-2000> <00:45:53> >>>> TOTEN
<Apr19-2000> <01:11:32> >>>> POPAN
<Apr19-2000> <01:11:34> >>>> DEBYE
<Apr19-2000> <01:11:40> >>>> AMETS
<Apr19-2000> <01:12:16> >>>> POPUL
<Apr19-2000> <01:12:28> Bond Energy LDA -10.81449156 a.u.
<Apr19-2000> <01:12:28> Bond Energy LDA -294.27740829 eV
<Apr19-2000> <01:12:28> + GGA-X -9.57975200 a.u.
<Apr19-2000> <01:12:28> + GGA-X -260.67842184 eV
<Apr19-2000> <01:12:28> + GGA-XC -10.10440790 a.u.
<Apr19-2000> <01:12:28> + GGA-XC -274.95504099 eV
<Apr19-2000> <01:12:28> NORMAL TERMINATION
<Apr19-2000> <01:12:29> END

```
